# Supplementary material for: Identifying Hepatocellular Carcinoma from imaging reports using natural language processing to facilitate data extraction from electronic patient records
Source: medRxiv preprint, doi:10.1101/2022.08.23.22279119, version 1 (2022-08-24)
Supplement: Supplementary Material [file 279119_file02.docx]

# Supplementary Material

**Table S1**. Lexicon of body systems and conditions that are described in liver and abdomen imaging reports but are irrelevant to findings of hepatocellular carcinoma

| **Body systems and conditions** | **Conditions** |
| --- | --- |
| Gallbladder | Gallstone |
| Spleen | Splenomegaly |
| Kidney/renal | Hydronephrosis |
| Lung |  |
| Lumbar spine |  |
| Pancreas |  |
| Pelvis |  |
| Urinary bladder |  |
| Common bile duct or CBD |  |
| Biliary tree |  |

**Table S2. Regular expressions of medical terms of interest**

| **Medical terms** | **Regular expressions** |
| --- | --- |
| HCC  (along with modifiers) | ['hcc'] = re.compile(r"((?<=^)|(?<= ))(hcc|hepatocellular carcinoma|hepatomas?)(?=\W|$)", re.I | re.M)  ['modifier_probable'] = re.compile(r"(probable|suspicious|likely|possible|may)") |
| Benign tumours | ["hemangiomas"] = re.compile(r"((?<=^)|(?<= ))(ha?emangioma(ta|s)?)(?=\W|$)" , re.I | re.M)  ["cyst"] = re.compile(r"((?<=^)|(?<= ))(cyst(s|ic)?)(?=\W|$)" , re.I | re.M)  ["cholecystitis"] = re.compile(r"((?<=^)|(?<= ))(cholecystitis)(?=\W|$)" , re.I | re.M) |
| Haematoma | re.compile(r"((?<=^)|(?<= ))(ha?ematoma)(?=\W|$)", re.I | re.M) |
| Metastasis | re.compile(r"((?<=^)|(?<= ))(metastas(i|e)s|metastatic|metastasize)(?=\W|$)", re.I | re.M) |
| Liver lesion/tumour  (along with modifiers) | re.compile(r"((?<=^)|(?<= ))((focal\s|enhancing\s|mass\s)?(liver\s)?(lesions?|tumours?|mass(es)?))(?=\W|$)" , re.I | re.M)  ['modifier_enlarge'] = re.compile(r"[^(no)] enlarged?|large|increased?", re.I | re.M)  ['modifier_unchanged'] = re.compile(r"not? changed?|not? changes?|unchanged?|unchanges?|stable|no enlarges?|no enlarged?", re.I | re.M)  ['modifier_small'] = re.compile(r"small|tiny|little", re.I | re.M) |
| APHE | re.compile(r"((?<=^)|(?<= ))(((hyper)?enhancement.*\sarterial(\sphase)?)|(arterial(\sphase)?.*\s(hyper)?enhancement)|APHE|(arterial(\sphase)? hypervascular(ity)?))(?=\W|$)", re.I | re.M) |
| Washout | re.compile(r"((?<=^)|(?<= ))((non(-| )?peripheral )?washout)(?=\W|$)", re.I | re.M) |
| Capsule  (along with modifiers) | ['capsule'] = re.compile(r"((?<=^)|(?<= ))(((non-?)?enhancing )?capsule)(?=\W|$)", re.I | re.M)  ['modifier_enhancing'] = re.compile(r"((?<=^)|(?<= ))enhancing(?= capsule)", re.I | re.M)  ['modifier_nonenhancing'] = re.compile(r"((?<=^)|(?<= ))non(-| )?enhancing(?= capsule)", re.I | re.M) |
| observation size | re.compile(r"((?<=^)|(?<= ))(liver|mass|tumour|lesion|nodule)(\s|\w)+(\d)+(\.\d+)?(\s)?(cm|mm)(?=\W|$)", re.I | re.M) |
| Size increase | re.compile( r"((?<=^)|(?<= ))(liver.+(increase in size))|((increase in size).+liver)(?=\W|$)", re.I | re.M) |
| Normal examination | re.compile( r"((?<=^)|(?<= ))(normal|stable|unremarkable|unchanged|asymptomatic)(?=\W|$)", re.I | re.M) |
| Hypervascular lesion | re.compile(r"((?<=^)|(?<= ))(hypervascular(ity)?( lesion(s)?| nodule(s)?)?)(?=\W|$)", re.I | re.M) |
| Nodules | re.compile(r"((?<=^)|(?<= ))(nodules?)(?=\W|$)", re.I | re.M) |

**Table S3. Running time* of data preprocessing and report labelling by the proposed rule-based model for the development set and validation set**

| Dataset | Total running time for data preprocessing | Total running time for report labelling |
| --- | --- | --- |
| Development set (Site 1, 655 reports) | 0.18 mins | 1.77 mins |
| Validation set (Site 2, 485 reports) | 0.10 mins | 1.25 mins |

** The programs were running on a computing environment with CPU memory of 32 GB.*

**Table S4**. Inconsistent identifications (compared to original labels) and reasons for site 1

| Reasons resulting in inconsistent classification | Note |
| --- | --- |
| Reasons for five HCC-labelled reports being identified as non-HCC:  1 report: no obvious focal lesion  1 report: no mass lesions  1 report: liver is normal in size, no focal mass  1 report: possible haemangioma  1 report: wrong identification by the algorithm (liver lesion in segment VIII has enlarged slightly, no evidence of distant metastases) | data error  data error  data error  data error  false negative |

**Table S5**. Inconsistent identifications (compared to original labels) and reasons for site 2

| Reasons resulting in inconsistent classification | Note |
| --- | --- |
| Reasons for one HCC-labelled report being identified as non-HCC:  1 report: hepatic haematoma, which is non-HCC case | data error |
| Reasons for three non-HCC-labelled reports being identified as HCC:  1 report: highly suspicious of a diffuse hepatocellular carcinoma  1 report: equivocal (a questionable 2.6 cm high density lesion, may be an HCC or regenerative nodule)  1 report: equivocal (may represent regenerating nodules or haemangiomata but focal hepatomas cannot be excluded) | data error  equivocal  equivocal |


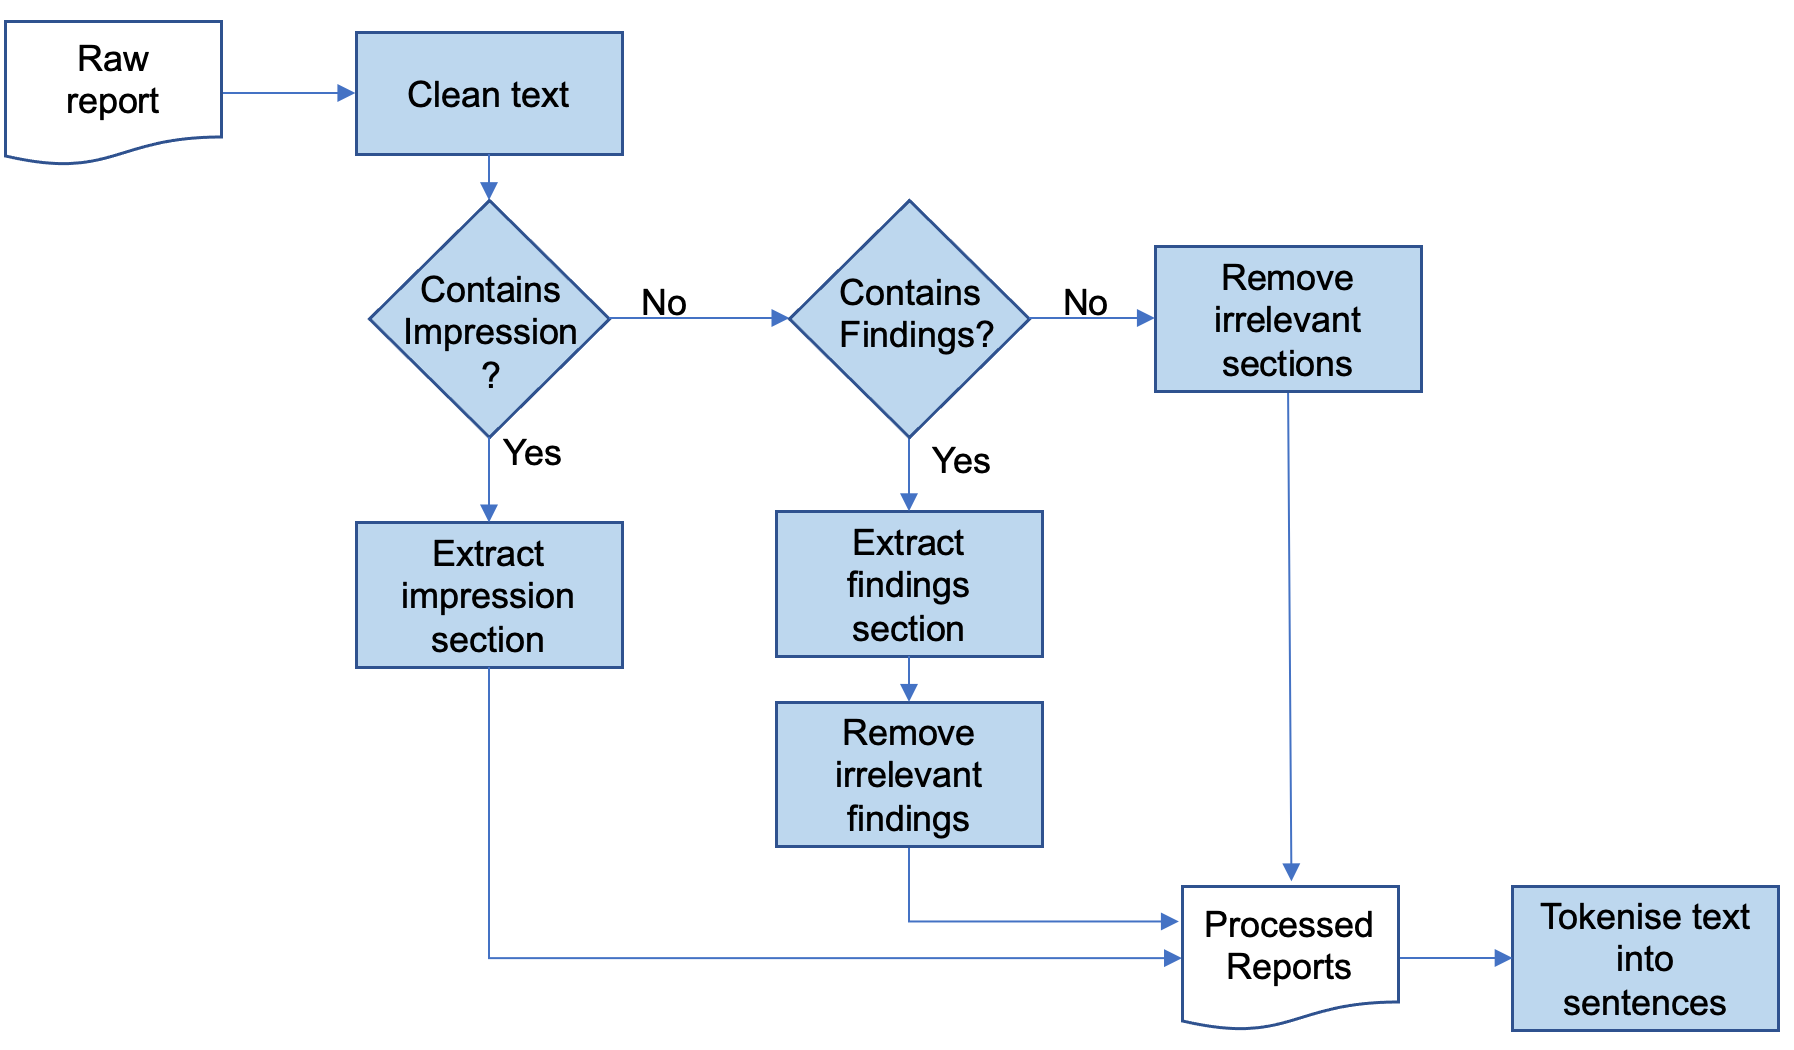


**Figure S1**. The text pre-processing pipeline for imaging reports


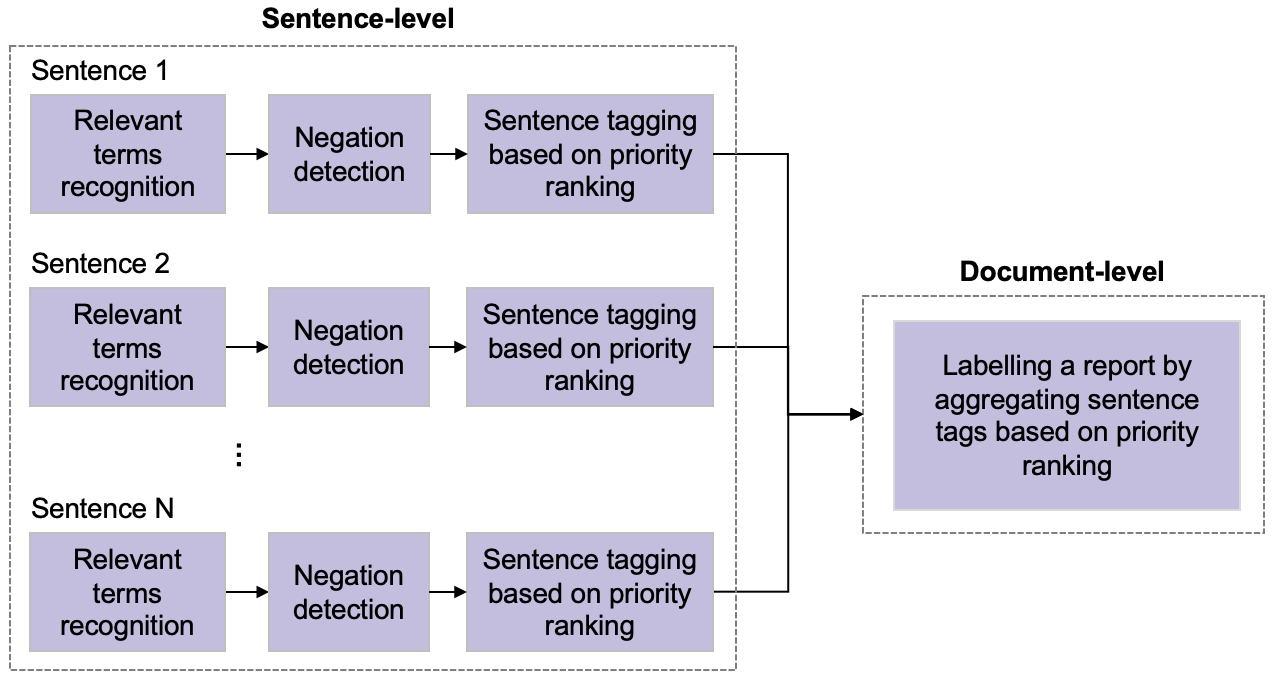


**Figure S2**. The logical process of labelling a report by the proposed rule-based NLP algorithm
